# Supplementary material for: Analysing Credibility of UK Social Media Influencers’ Weight-Management Blogs: A Pilot Study
Source: MDPI journal article supplement (doi:10.3390/ijerph17239022), 2020-12-03
Supplement: s1 [file s1]

Table S1. Full breakdown of themes and quality indicators used in the analysis. Full results are displayed alongside percentage pass and fail rates for each influencer

| Theme                                                                                          | Influencer |       |       |       |       |       |       |       |       |
|------------------------------------------------------------------------------------------------|------------|-------|-------|-------|-------|-------|-------|-------|-------|
| Transparency                                                                                   | SMI-1      | SMI-2 | SMI-3 | SMI-4 | SMI-5 | SMI-6 | SMI-7 | SMI-8 | SMI-9 |
| Is the identity of the author always clear?                                                    | Yes        | Yes   | Yes   | Yes   | Yes   | Yes   | Yes   | Yes   | Yes   |
| Is there a professional statement present?                                                     | No         | Yes   | No    | No    | Yes   | Yes   | Yes   | Yes   | No    |
| Does the influencer respect and protect the privacy of blog readers?                           | Yes        | Yes   | No    | No    | Yes   | No    | No    | Yes   | No    |
| Are appropriate disclaimers regarding the use of the blog stated clearly?                      | Yes        | Yes   | No    | Yes   | No    | No    | No    | Yes   | No    |
| Use of other resources                                                                         |            |       |       |       |       |       |       |       |       |
| Are references cited on the blog?                                                              | No         | No    | Yes   | 0     | No    | No    | Yes   | No    | 0     |
| Are the references evidence-based?                                                             | No         | No    | Yes   | 0     | No    | No    | Yes   | No    | 0     |
| Trustworthiness and adherence to nutritional criteria                                          |            |       |       |       |       |       |       |       |       |
| Is the author qualified to provide weight management information?                              | No         | No    | No    | No    | No    | Yes   | Yes   | No    | No    |
| Has the influencer been awarded any quality credentials/badges from independent organisations? | No         | No    | No    | No    | No    | No    | Yes   | No    | No    |
| Do the recipes in the blog adhere to UK nutritional criteria (PHE)?                            | Yes        | No    | Yes   | No    | No    | Yes   | Yes   | Yes   | No    |
| Do the recipes in the blog adhere to UK nutritional criteria (FSA)?                            | No         | No    | No    | No    | No    | No    | Yes   | Yes   | Yes   |
| Bias                                                                                           |            |       |       |       |       |       |       |       |       |
| Does the blog clearly differentiate between advertisement and content?                         | Yes        | Yes   | Yes   | Yes   | No    | Yes   | Yes   | Yes   | Yes   |
| If the blog includes external advertising, is it disclosed?                                    | Yes        | No    | Yes   | Yes   | No    | Yes   | Yes   | Yes   | Yes   |
| Does the influencer always make clear distinction between fact and opinion on their blog?      | No         | No    | No    | 0     | No    | No    | Yes   | No    | 0     |
| Yes (%)                                                                                        | 46%        | 38%   | 46%   | 40%   | 23%   | 46%   | 85%   | 61%   | 40%   |
